# Supplementary material for: Polysaccharide utilization loci from Bacteroidota encode CE15 enzymes with possible roles in cleaving pectin-lignin bonds
Source: PubMed Central journal article supplement (PMC10807430; doi:10.1128/aem.01768-23), 2024-01-05
Supplement: aem.01768-23-s0001.pdf [file aem.01768-23-s0001.pdf]

Supplementary information for:

## Polysaccharide utilization loci from Bacteroidota encode CE15 enzymes with possible role in cleaving pectin-lignin bonds

Andrea Seveso<sup>1</sup>, Scott Mazurkewich<sup>1</sup>, Sanchari Banerjee<sup>2</sup>, Jens-Christian Navarro Poulsen<sup>2</sup>,  
Leila Lo Leggio<sup>2</sup>, Johan Larsbrink<sup>1</sup>

<sup>1</sup>Wallenberg Wood Science Center, Division of Industrial Biotechnology, Department of Life Sciences, Chalmers University of Technology, SE-412 96 Gothenburg, Sweden

<sup>2</sup>Department of Chemistry, University of Copenhagen, Universitetsparken 5, DK-2100 Copenhagen, Denmark

**Table S1. Primers used in this study.**

| Gene           | Organism                        | Primer  | 5'-3' sequence                     |
|----------------|---------------------------------|---------|------------------------------------|
| <i>AsCE15</i>  | <i>Alistipes shahii</i>         | Forward | CAGATGCCCGCGACAAA                  |
|                |                                 | Reverse | TCGTTTCAGGTGTTTGTCCG               |
| <i>PdCE15</i>  | <i>Phocaeicola dorei</i>        | Forward | GGGAAGTCTCCTAGAAAAGACTATG          |
|                |                                 | Reverse | TTTGTTTTTAAAATATTTGTCAGCAAACG      |
| <i>BiCE15</i>  | <i>Bacteroides intestinalis</i> | Forward | AGTCTTCCTAAAGACACTATCTTCAG         |
|                |                                 | Reverse | CTTCTGAACCATTTATCTGCAAAC           |
| <i>PvCE15</i>  | <i>Phocaeicola vulgatus</i>     | Forward | GGAAAATCTCCTAGAAAAGACTATGC         |
|                |                                 | Reverse | TTTGTTTTTAAAATATTTGTCAGCAAAGC      |
| <i>PiCE15A</i> | <i>Parapedobacter indicus</i>   | Forward | GGCCAGCCAGATCCC                    |
|                |                                 | Reverse | TAAAAATTTTTTCATGTATTCAATAAATACCTGC |

**Table S2. Summary of crystallographic statistics.**

|                                                     | <i>Pv</i> CE15             | <i>Pv</i> CE15-GlcA         | <i>Pv</i> CE15-GalA          |
|-----------------------------------------------------|----------------------------|-----------------------------|------------------------------|
| <b>Data Collection</b>                              |                            |                             |                              |
| Date                                                | 06/12/2019                 | 09/09/2022                  | 07/12/2022                   |
| Source                                              | BioMAX at MAXIV            | ID30B at ESRF               | BioMAX at MAXIV              |
| Wavelength (Å)                                      | 0.976254                   | 0.9116                      | 0.9763                       |
| Space group                                         | <i>P</i> 2 <sub>1</sub>    | <i>P</i> 2 <sub>1</sub>     | <i>P</i> 2 <sub>1</sub>      |
| Cell dimensions                                     |                            |                             |                              |
| a, b, c (Å)                                         | 77.4, 58.7, 89.5           | 74.3, 59.5, 87.5            | 74.3, 59.2, 87.3             |
| α, β, γ (°)                                         | 90.0, 103.9, 90.0          | 90.0, 101.6, 90.0           | 90.0, 101.4, 90.0            |
| No. of measured reflections                         | 276530 (20598)             | 191728 (9957)               | 193217 (8592)                |
| No. of independent reflections                      | 50852 (4674)               | 42976 (2149)                | 28249 (1413)                 |
| Resolution (Å)                                      | 43.45 - 1.99 (2.06 - 1.99) | 48.90 - 1.84 (1.99 - 1.84)  | 85.40 - 2.16 (2.20 - 2.16)   |
| Ellipsoidal resolution limit (Å) <sup>1</sup>       | -                          | 2.239 [0.715 a* - 0.699 c*] | 2.063 [0.740 a* + 0.672 c*]  |
|                                                     | -                          | 2.271 [b*]                  | 2.494 [b*]                   |
|                                                     | -                          | 1.730 [0.541 a* + 0.841 c*] | 2.577 [-0.583 a* + 0.813 c*] |
| <i>R</i> <sub>merge</sub> <sup>2</sup>              | 0.105 (2.146)              | 0.099 (0.827)               | 0.259 (1.183)                |
| Completeness spherical (%)                          | 94.16 (85.19)              | 65.7 (14.7)                 | 70.6 (15.9)                  |
| Completeness ellipsoidal (%)                        | -                          | 93.0 (75.2)                 | 98.3 (70.9)                  |
| CC <sub>1/2</sub> (%)                               | 0.998 (0.413)              | 99.6 (57.5)                 | 98.6 (47.6)                  |
| < <i>I</i> /σ( <i>I</i> )>                          | 8.66 (0.64)                | 8.4 (1.6)                   | 6.7 (1.7)                    |
| Multiplicity                                        | 5.4 (4.4)                  | 4.5 (4.6)                   | 6.8 (6.1)                    |
| <b>Refinement</b>                                   |                            |                             |                              |
| <i>R</i> <sub>work</sub> / <i>R</i> <sub>free</sub> | 0.194/0.258                | 0.179/0.231                 | 0.184/0.254                  |
| No. of atoms                                        |                            |                             |                              |
| Protein                                             | 6401                       | 6339                        | 6289                         |
| Ligand/ions                                         | 21                         | 44                          | 30                           |
| Water                                               | 281                        | 289                         | 97                           |
| Average B-factors                                   |                            |                             |                              |
| Protein                                             | 45.3                       | 27.9                        | 35.6                         |
| Ligand/ions                                         | 56.5                       | 40.4                        | 48.6                         |
| Water                                               | 45.2                       | 28.9                        | 25.8                         |
| RMSD from ideal geometry <sup>3</sup>               |                            |                             |                              |
| Bond lengths (Å)                                    | 0.010                      | 0.013                       | 0.013                        |
| Bond Angles (°)                                     | 1.12                       | 1.76                        | 1.83                         |
| Ramachandran Statistics                             |                            |                             |                              |
| Favoured/Allowed/Outliers (%)                       | 95.9/4.0/0.1               | 96.4/3.4/0.3                | 94.7/4.8/0.5                 |
| PDB accession                                       | 8Q6S                       | 8QCL                        | 8QEF                         |

<sup>1</sup> Brackets represent the direction along the reciprocal lattice. <sup>2</sup>  $R_{\text{merge}} = \sum_{hkl} \sum_i |I_i(hkl) - \langle I(hkl) \rangle| / \sum_{hkl} \sum_i I_i(hkl)$ , wherein  $I_i(hkl)$  is the intensity of the  $i$ th measurement of reflection  $hkl$ , and  $\langle I(hkl) \rangle$  is the mean value of  $I_i(hkl)$  for all the  $i$  measurements. <sup>3</sup> Root mean square deviations from ideal geometry values (1).

**Table S3. Sequence identity matrix of certain characterized CE15 members.** Additional members beyond this study include the fungal GEs from *Cerrena unicolor* (*CuGE*) and *Sporotrichum thermophile* (*StGE2*) highlighted in green, and bacterial CE15 members from *Opitutus terrae* (*OtCE15A* and *OtCE15C*), *Solibacter usitatus* (*SuCE15C*), and *Teredinibacter turnerae* (*TtCE15A*) highlighted in red. Sequences were trimmed to only the CE15 domain, ie. excluding possible additional binding- or catalytic domains, and signal peptides.

|                | <i>AsCE15</i> | <i>PdCE15</i> | <i>BiCE15</i> | <i>PvCE15</i> | <i>PiCE15A</i> | <i>CuGE</i> | <i>StGE2</i> | <i>OtCE15A</i> | <i>OtCE15C</i> | <i>SuCE15C</i> | <i>TtCE15A</i> |
|----------------|---------------|---------------|---------------|---------------|----------------|-------------|--------------|----------------|----------------|----------------|----------------|
| <i>AsCE15</i>  | 100           | 51.4          | 60.5          | 51.4          | 42.0           | 25.8        | 25.3         | 52.7           | 44.4           | 48.8           | 34.8           |
| <i>PdCE15</i>  | 51.4          | 100           | 51.5          | 98.8          | 38.9           | 25.8        | 25.0         | 45.0           | 40.6           | 48.9           | 30.3           |
| <i>BiCE15</i>  | 60.5          | 51.5          | 100           | 51.3          | 37.5           | 27.0        | 24.4         | 45.9           | 38.6           | 46.3           | 30.5           |
| <i>PvCE15</i>  | 51.4          | 98.8          | 51.3          | 100           | 39.4           | 25.5        | 25.3         | 45.2           | 41.1           | 49.1           | 30.0           |
| <i>PiCE15A</i> | 42.0          | 38.9          | 37.5          | 39.4          | 100            | 24.7        | 25.7         | 36.8           | 54.0           | 40.4           | 32.7           |
| <i>CuGE</i>    | 25.8          | 25.8          | 27.0          | 25.5          | 24.7           | 100         | 48.1         | 26.1           | 26.0           | 23.8           | 22.9           |
| <i>StGE2</i>   | 25.3          | 25.0          | 24.4          | 25.3          | 25.7           | 48.1        | 100          | 26.3           | 25.2           | 24.5           | 22.3           |
| <i>OtCE15A</i> | 52.7          | 45.0          | 45.9          | 45.2          | 36.8           | 26.1        | 26.3         | 100            | 43.9           | 48.6           | 32.6           |
| <i>OtCE15C</i> | 44.4          | 40.6          | 38.6          | 41.1          | 54.0           | 26.0        | 25.2         | 43.9           | 100            | 45.6           | 34.2           |
| <i>SuCE15C</i> | 48.8          | 48.9          | 46.3          | 49.1          | 40.4           | 23.8        | 24.5         | 48.6           | 45.6           | 100            | 34.7           |
| <i>TtCE15A</i> | 34.8          | 30.3          | 30.5          | 30.0          | 32.7           | 22.9        | 22.3         | 32.6           | 34.2           | 34.7           | 100            |

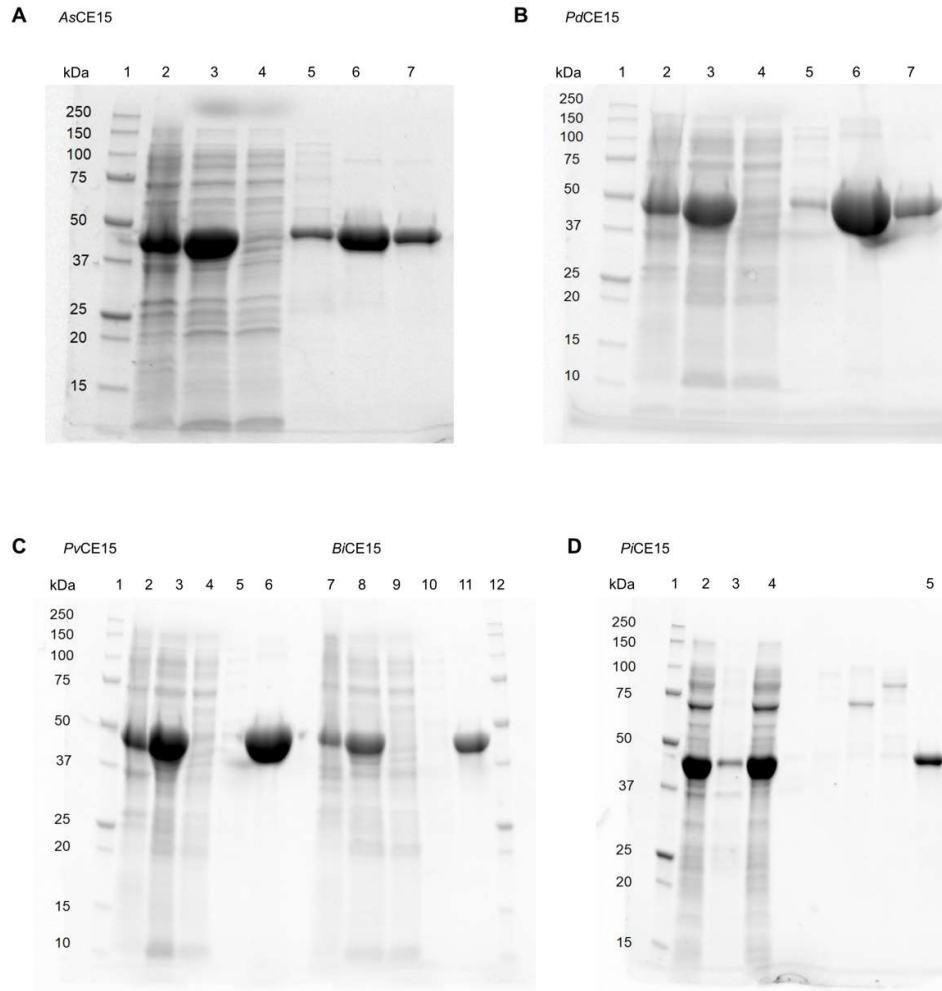

**Figure S1. SDS-PAGE analysis of FPLC purification steps from *E. coli* cell lysates.** A) Results from IMAC for *AsCE15* with marker (1), insoluble phase of cell lysate (2), soluble phase (3), flowthrough (4), wash (5), elution (6 and 7). B) Results from IMAC for *PdCE15* with marker (1), insoluble phase of cell lysate (2), soluble phase (3), flowthrough (4), wash (5), elution (6,7). C) Results from IMAC for *PvCE15* and *BiCE15* with marker (1, 12), insoluble phase of cell lysate (2,7), soluble phase (3,8), flowthrough (4,9), wash (5,10), elution (6,11). D) Results from SEC for *PiCE15A* with marker (1), resuspension after ammonium sulfate precipitation (2), precipitate after centrifugation (3), soluble phase (4), elution (5), and with unlabeled lanes corresponding to other peaks in the chromatogram that were analyzed to verify the absence of *PiCE15A*.

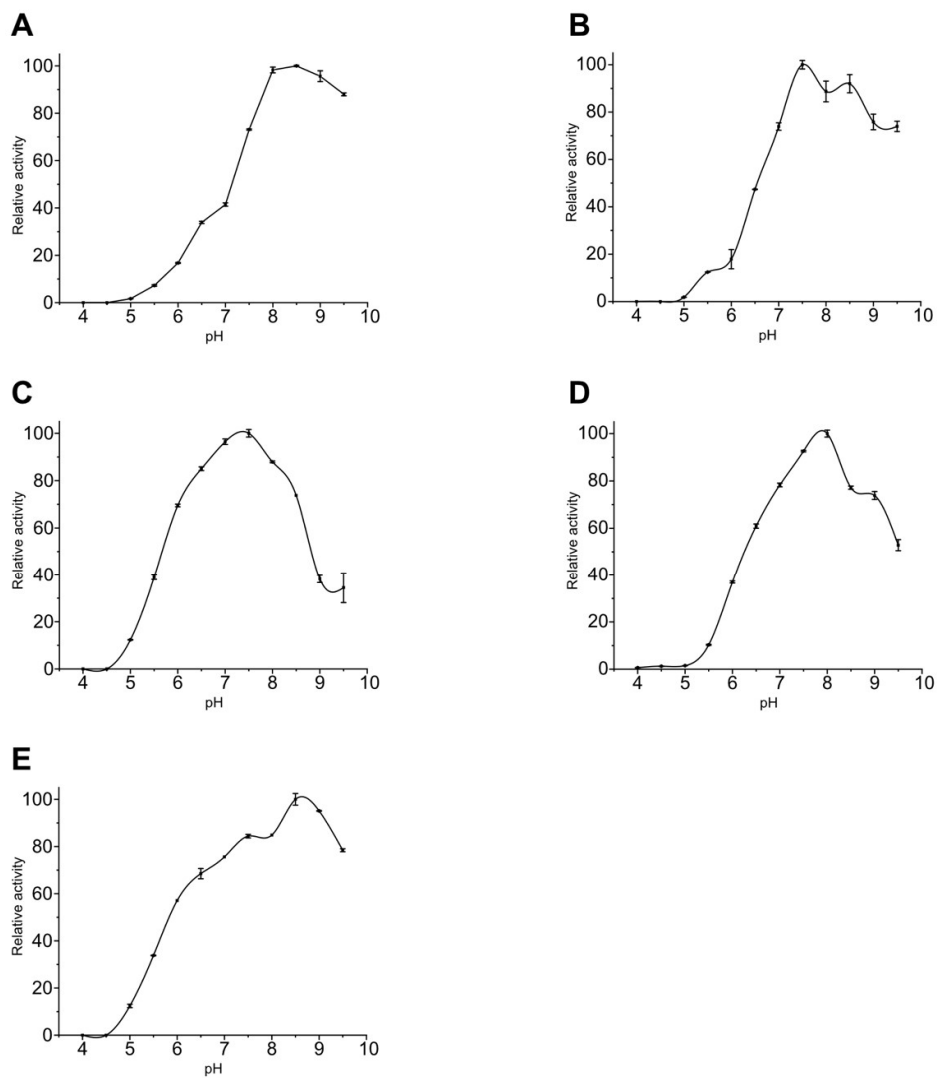

**Figure S2. The dependence of pH for esterase activity on BnzGlcA.** Activity profiles for (A) *AsCE15*, (B) *PdCE15*, (C) *BiCE15*, (D) *PvCE15*, and (E) *PiCE15A*. Mean values of relative activity from duplicate measurements are plotted with standard error of the mean with the maximal activity taken as 100%.

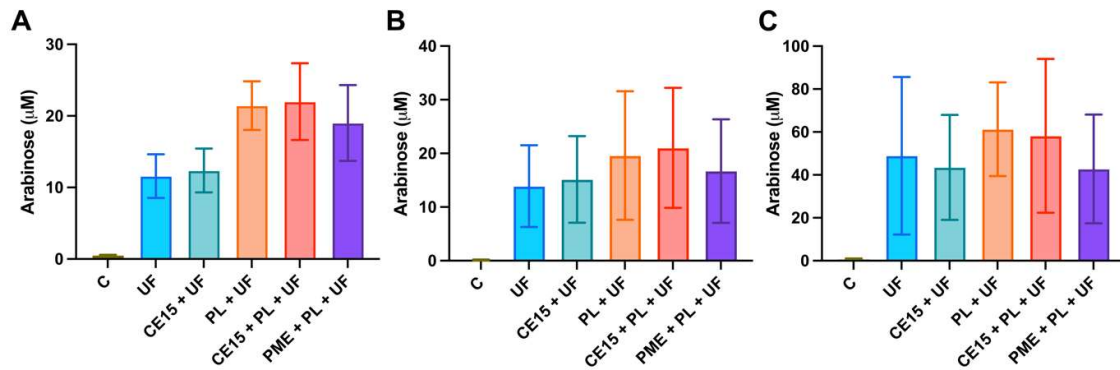

**Figure S3. Effect of *Pv*CE15 on arabinose released during a 1-hour saccharification of different pectin rich biomasses.** Biomass materials of (A) carrot pomace, (B) potato peels, and (C) orange peels were milled, washed, and resuspended into assays of 5 mg/mL and incubated for 1 hour at 30 °C with either UltraFlo (UF), *Pv*CE15 (CE15), pectate lyase (PL), or pectin methyl esterase (PME). Released monosaccharides from assays (N=4) were quantified by ion chromatography (HPAEC-PAD). The addition of *Pv*CE15 to either UltraFlo or UltraFlo supplemented with the pectate lyase did not lead to significant increases in released arabinose.

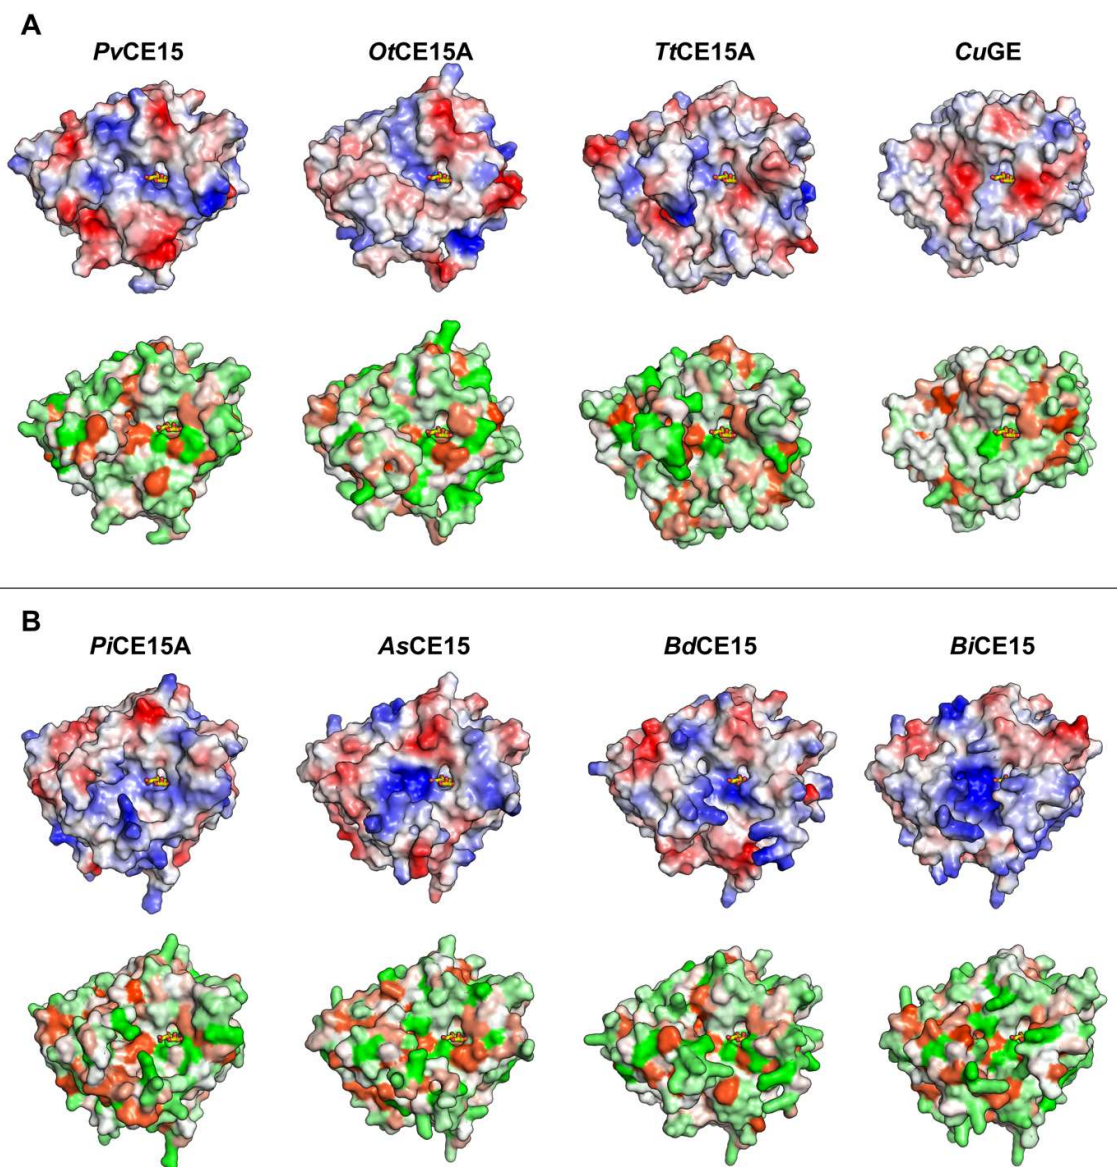

**Figure S4. Comparison of predicted surface properties of CE15 structures.** (A) Experimentally determined structures of *Pv*CE15, *Ot*CE15A (PDB accession: 6syr), *Tt*CE15A (PDB accession: 6hsw), and *Cu*GE (PDB accession: 6ru2), shown with (B) models of *Pi*CE15A, *As*CE15, *Bd*CE15, and *Bi*CE15 generated by AlphaFold in ColabFold (2). The surface representation of the proteins with coloring by (top) vacuum electrostatics defined Pymol with ranging from +100 to -100 with electronegative as red, electropositive as blue, and neutral as white. The surface representation of the proteins with coloring by (below) hydrophobicity with hydrophobic residues as orange, hydrophilic residues as green, and neutral as white. All structures are shown in the same orientation with the glucuronate observed in *Pv*CE15 (yellow sticks) placed in the other models by structural alignment.

## Supplementary References

1. R. A. Engh, R. Huber, Accurate bond and angle parameters for X-ray protein structure refinement. *Acta Crystallographica Section A* **47**, 392-400 (1991).
2. M. Mirdita *et al.*, ColabFold: making protein folding accessible to all. *Nat Methods* **19**, 679-682 (2022).
